# Supplementary material for: Simultaneous Detection of SARS-CoV-2 Nucleoprotein and Receptor Binding Domain by a Multi-Area Reflectance Spectroscopy Sensor
Source: MDPI journal article supplement (doi:10.3390/bios13090865), 2023-09-01
Supplement: s1 [file s1]

*Supplementary Material*

# Simultaneous Detection of SARS-CoV-2 Nucleoprotein and Receptor Binding Domain by a Multi-Area Reflectance Spectroscopy Sensor

Dimitra Tsounidi <sup>1</sup>, Michailia Angelopoulou <sup>1</sup>, Panagiota Petrou <sup>1</sup>, Ioannis Raptis <sup>2</sup>, Sotirios Kakabakos <sup>1\*</sup>

<sup>1</sup> Immunoassays-Immunosensors Lab, Institute of Nuclear and Radiological Sciences and Technology, Energy and Safety, NCSR “Demokritos”, 15341 Aghia Paraskevi, Greece; dtsounidi@rrp.demokritos.gr (D.T.); mikangel@ipta.demokritos.gr (M.A.); ypetrou@rrp.demokritos.gr (P.P.)

<sup>2</sup> Institute of Nanoscience and Nanotechnology, NCSR “Demokritos, 15341 Aghia Paraskevi, Greece; i.raptis@inn.demokritos.gr

\* Correspondence: skakab@rrp.demokritos.gr; Tel.: +30-2106503861 (S.K.)

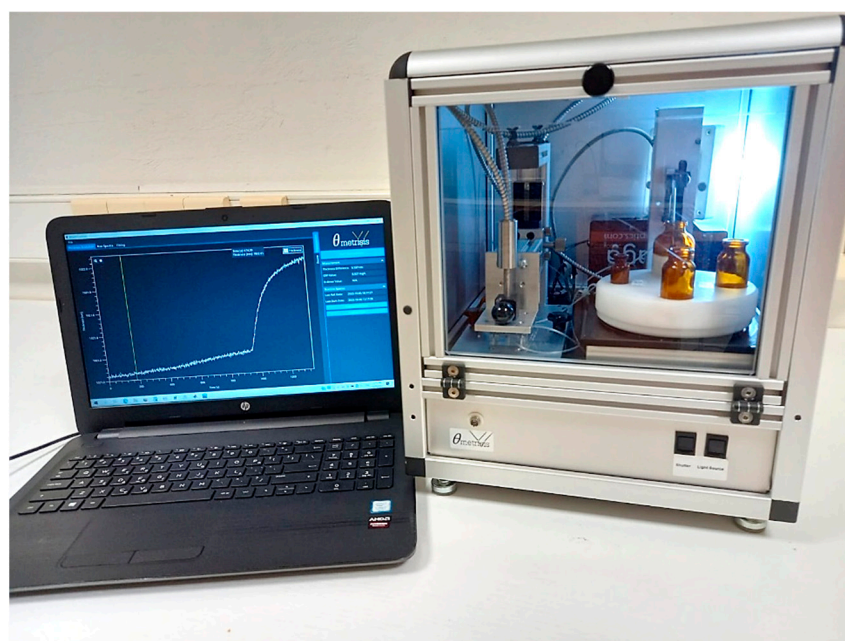

**Figure S1.** Image of the compact biosensing device employed for the development of the proposed MARS immunosensor.

**Table S1.** Percent recovery values of RBD added to calibrators prepared in extraction buffer of nasopharyngeal swabs obtained from a commercially available kit.

| Sample | Concentration prior to addition (ng/mL) | Concentration added (ng/mL) | Concentration determined after addition (ng/mL)* | Recovery (%R) |
|--------|-----------------------------------------|-----------------------------|--------------------------------------------------|---------------|
| 1      | 0                                       | 10                          | 10.9±0.5                                         | 109±5.0       |
| 2      | 10                                      | 10                          | 19.0±0.8                                         | 90.0±8.0      |
| 3      | 20                                      | 20                          | 41.8±1.4                                         | 109±7.0       |
| 4      | 50                                      | 50                          | 95.2±2.1                                         | 90.4±4.2      |
| 5      | 100                                     | 80                          | 185±5.0                                          | 106±6.2       |

\* Mean value ± S.D.; N=3.

**Table S2.** Percent recovery values of NP added to calibrators prepared in extraction buffer of nasopharyngeal swabs obtained from a commercially available kit.

| Sample | Concentration prior to addition (ng/mL) | Concentration added (ng/mL) | Concentration determined after addition (ng/mL)* | Recovery (%R) |
|--------|-----------------------------------------|-----------------------------|--------------------------------------------------|---------------|
| 1      | 0                                       | 10                          | 9.6±0.4                                          | 96.0±4.0      |
| 2      | 10                                      | 10                          | 20.8±0.6                                         | 108±6.0       |
| 3      | 20                                      | 20                          | 40.5±1.2                                         | 102±6.0       |
| 4      | 50                                      | 50                          | 105±2.3                                          | 110±4.6       |
| 5      | 100                                     | 80                          | 175±4.0                                          | 93.7±5.0      |

\* Mean value ± S.D.; N=3.
